# Supplementary material for: Tunable luminescence in Pr3+ single-doped oxyfluoride glass ceramic and fibers
Source: Royal Society of Chemistry journal article supplement (doi:10.1039/d2tc00552b), 2022-01-01
Supplement: d2tc00552b1.pdf [file d2tc00552b1.pdf]

## Supporting Information

### **Tunable Luminescence in Pr<sup>3+</sup> Single-Doped Oxyfluoride Glass Ceramic and Fiber**

Yongsheng Sun<sup>a</sup>, Minbo Wu<sup>a</sup>, Shuhang Tian<sup>a</sup>, Zhenguo Shi<sup>a</sup>, Zhenjie Lun<sup>a</sup>, Qingquan Jiang<sup>a</sup>,  
Yajing Zhao<sup>a</sup>, Dongdan Chen<sup>a,\*</sup>, Puxian Xiong<sup>b,\*</sup>, and Zhongmin Yang<sup>a</sup>

<sup>a</sup>State Key Laboratory of Luminescent Materials and Devices, School of Materials Science and Engineering, South China University of Technology, Guangdong Provincial Key Laboratory of Fiber Laser Materials and Applied Techniques, Guangdong Engineering Technology Research and Development Center of Special Optical Fiber Materials and Devices, Guangzhou 510641, China.

<sup>b</sup> School of Physics and Optoelectronics, State Key Laboratory of Luminescent Materials and Devices, Guangdong Provincial Key Laboratory of Fiber Laser Materials and Applied Techniques, Guangdong Engineering Technology Research and Development Center of Special Optical Fiber Materials and Devices, South China University of Technology, Guangzhou 510641, China.

\*Corresponding Authors: Dongdan Chen, [ddchen@scut.edu.cn](mailto:ddchen@scut.edu.cn)

Puxian Xiong, [msxiong.puxian@mail.scut.edu.cn](mailto:msxiong.puxian@mail.scut.edu.cn)

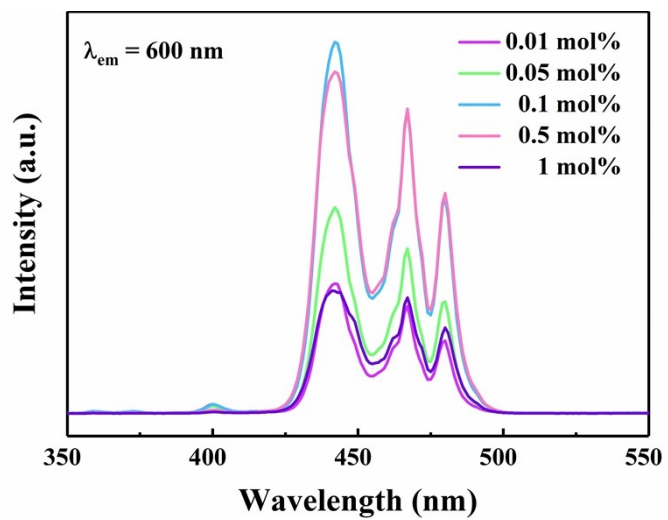

**Figure S1.** Photoluminescence excitation spectra measured by monitoring 600 nm emission.

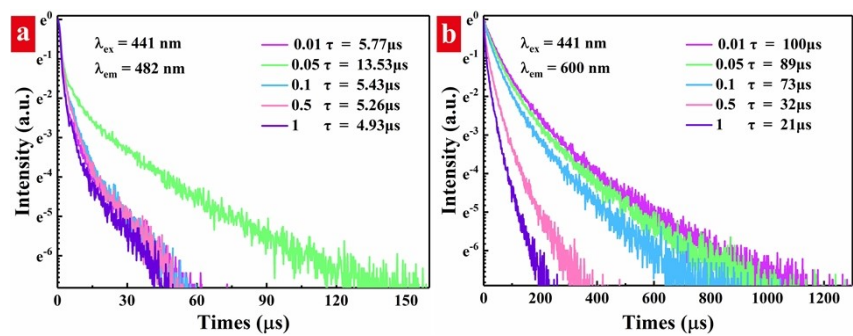

**Figure S2.** Fluorescence lifetimes at a) 482 nm and b) 600 nm excited at 441 nm of the  $\text{Pr}^{3+}$  doped PG samples.

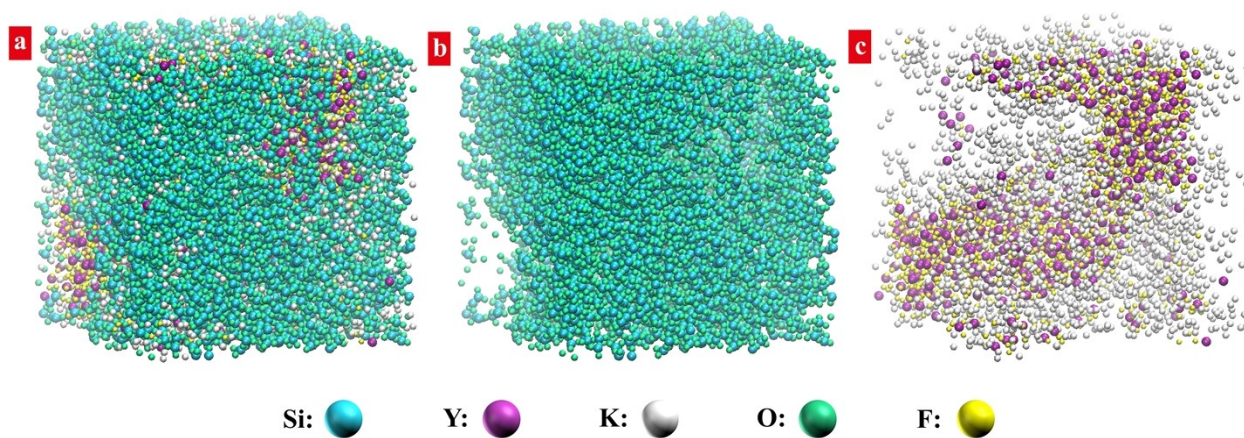

**Figure S3.** Molecular dynamics (MD) simulations of precursor glass in a 3D view: (a) whole atoms, (b) Si/O distribution, and (c) K/Y/F distribution.

**Table S1.** Chromaticity coordinates and correlated color temperatures of the Pr<sup>3+</sup> single-doped GCs at various crystallization temperatures.

|   | Samples    | Chromaticity coordinates |          | CCT (K) |
|---|------------|--------------------------|----------|---------|
|   |            | <i>x</i>                 | <i>y</i> |         |
| 1 | PG         | 0.5754                   | 0.3707   | 1768    |
| 2 | 450 °C 2 h | 0.5387                   | 0.3694   | 1767    |
| 3 | 460 °C 2 h | 0.5093                   | 0.3618   | 1843    |
| 4 | 470 °C 2 h | 0.4804                   | 0.3609   | 2048    |
| 5 | 480 °C 2 h | 0.4347                   | 0.3488   | 2533    |
| 6 | 490 °C 2 h | 0.4223                   | 0.3477   | 2751    |
| 7 | 500 °C 2 h | 0.3463                   | 0.3251   | 4853    |
| 8 | 510 °C 2 h | 0.3186                   | 0.3224   | 6222    |
| 9 | 520 °C 2 h | 0.286                    | 0.3112   | 8529    |

**Table S2.** Chromaticity coordinates and correlated color temperatures of the Pr<sup>3+</sup> single-doped glass fiber and GC fibers heat-treated at 520 and 560 °C for 5 h.

|   | Samples     | Chromaticity coordinates |          | CCT (K) |
|---|-------------|--------------------------|----------|---------|
|   |             | <i>x</i>                 | <i>y</i> |         |
| 1 | glass fiber | 0.5914                   | 0.3781   | 1782    |
| 2 | 520 °C 5 h  | 0.4384                   | 0.3367   | 2338    |
| 3 | 560 °C 5 h  | 0.3355                   | 0.3294   | 5353    |
